# Supplementary material for: Bioturbation enhances C and N contents on near-surface soils in resource-deficient arid climate regions but shows adverse effects in more temperate climates
Source: Copernicus journal article supplement (doi:10.5194/egusphere-2022-1427), 2023-02-06
Supplement: Supplementary file 1 [file egusphere-2022-1427-supplement.zip]

# 1    **Supplementary material**

## 2    **I Raw data of soil property variables and their correlation**

### 3    **TableS1**

4    WGS84 coordinates of the soil sampling locations Pan de Azúcar, Santa Gracia, La Campana.

| Research Site | Plot number | Latitude  | Longitude |
|---------------|-------------|-----------|-----------|
| Pan de Azúcar | PdA1        | -26.08611 | -70.61611 |
| Pan de Azúcar | PdA2        | -25.98861 | -70.81500 |
| Pan de Azúcar | PdA3        | -26.05333 | -70.83416 |
| Pan de Azúcar | PdA4        | -25.97277 | -70.84611 |
| Pan de Azúcar | PdA5        | -26.09555 | -70.86166 |
| Pan de Azúcar | PdA6        | -26.10777 | -70.86916 |
| Pan de Azúcar | PdA7        | -25.97423 | -70.61663 |
| Pan de Azúcar | PdA8        | -25.98505 | -70.44626 |
| Pan de Azúcar | PdA9        | -25.98366 | -70.61336 |
| Pan de Azúcar | PdA11       | -25.98053 | -70.61653 |
| Pan de Azúcar | PdA12       | -25.97907 | -70.61585 |
| Pan de Azúcar | PdA13       | -25.97122 | -70.61438 |
| Pan de Azúcar | PdA14       | -25.97183 | -70.61430 |
| Pan de Azúcar | PdA17       | -25.98270 | -70.61353 |
| Pan de Azúcar | PdA18       | -25.98251 | -70.61229 |
| Santa Gracia  | SG1         | -29.88277 | -71.16500 |
| Santa Gracia  | SG2         | -29.75825 | -71.16712 |
| Santa Gracia  | SG3         | -29.75653 | -71.16605 |
| Santa Gracia  | SG4         | -29.75736 | -71.16531 |
| Santa Gracia  | SG5         | -23.76303 | -71.16536 |
| Santa Gracia  | SG6         | -29.76216 | -71.16406 |
| Santa Gracia  | SG8         | -29.76081 | -71.16535 |
| Santa Gracia  | SG9         | -29.76086 | -71.16605 |
| Santa Gracia  | SG10        | -29.75783 | -71.16521 |
| Santa Gracia  | SG11        | -29.75648 | -71.16661 |
| Santa Gracia  | SG12        | -29.75631 | -71.16545 |
| Santa Gracia  | SG13        | -29.76319 | -71.16510 |
| La Campana    | LC2         | -32.93113 | -71.09121 |
| La Campana    | LC3         | -32.93068 | -71.09068 |
| La Campana    | LC5         | -32.93133 | -71.09030 |
| La Campana    | LC7         | -32.95216 | -71.06231 |
| La Campana    | LC8         | -32.95170 | -71.06205 |
| La Campana    | LC10        | -32.93924 | -71.08601 |
| La Campana    | LC11        | -32.93987 | -71.08579 |
| La Campana    | LC14        | -32.93045 | -71.09193 |
| La Campana    | LC19        | -32.93954 | -71.08597 |

5

### 6    **Table S2**

7    Raw data of the physical (clay, silt, sand) and chemical (C, N, P) soil properties. The mean and standard deviation  
8    (SD) of the total amount (in both mound and control samples) of the measured soil properties clay, silt, sand, C, N,  
9    P as well as the mean and SD of the amount of soil properties of mound and unaffected control samples separately  
10    and the percentual input of all properties in all research sites are listed.

| Soil properties | Site          | Mean and SD of total amount (mound and control) | Mean and SD of mound samples | Mean and SD of control samples | % Input (mound - control) |
|-----------------|---------------|-------------------------------------------------|------------------------------|--------------------------------|---------------------------|
| Clay [%]        | Pan de Azúcar | 0.10 ± 0.09                                     | 0.10 ± 0.09                  | 0.10 ± 0.09                    | 0                         |
|                 | Santa Gracia  | 0.20 ± 0.11                                     | 0.20 ± 0.09                  | 0.19 ± 0.13                    | 5                         |
|                 | La Campana    | 0.21 ± 0.10                                     | 0.18 ± 0.11                  | 0.23 ± 0.09                    | -28                       |
| Silt [%]        | Pan de Azúcar | 0.38 ± 0.13                                     | 0.38 ± 0.12                  | 0.39 ± 0.14                    | -3                        |
|                 | Santa Gracia  | 0.14 ± 0.08                                     | 0.13 ± 0.08                  | 0.15 ± 0.09                    | -15                       |
|                 | La Campana    | 0.25 ± 0.17                                     | 0.25 ± 0.18                  | 0.26 ± 0.16                    | -4                        |
| Sand [%]        | Pan de Azúcar | 0.51 ± 0.12                                     | 0.52 ± 0.11                  | 0.51 ± 0.14                    | 2                         |
|                 | Santa Gracia  | 0.66 ± 0.11                                     | 0.67 ± 0.10                  | 0.66 ± 0.12                    | 1                         |
|                 | La Campana    | 0.54 ± 0.21                                     | 0.57 ± 0.23                  | 0.52 ± 0.19                    | 26                        |
| C [%]           | Pan de Azúcar | 2.98 ± 2.66                                     | 3.32 ± 2.78                  | 2.64 ± 2.51                    | 20                        |
|                 | Santa Gracia  | 1.49 ± 0.99                                     | 1.74 ± 1.17                  | 1.25 ± 0.71                    | 28                        |
|                 | La Campana    | 6.65 ± 6.70                                     | 8.95 ± 8.74                  | 4.34 ± 2.07                    | 52                        |
| N [%]           | Pan de Azúcar | 0.31 ± 0.33                                     | 0.36 ± 0.39                  | 0.27 ± 0.24                    | 25                        |
|                 | Santa Gracia  | 0.19 ± 0.11                                     | 0.20 ± 0.11                  | 0.18 ± 0.11                    | 10                        |
|                 | La Campana    | 0.57 ± 0.44                                     | 0.73 ± 0.55                  | 0.41 ± 0.21                    | 44                        |
| P [ppm]         | Pan de Azúcar | 0.73 ± 0.40                                     | 0.78 ± 0.43                  | 0.69 ± 0.37                    | 12                        |
|                 | Santa Gracia  | 0.74 ± 0.30                                     | 0.80 ± 0.31                  | 0.69 ± 0.27                    | 14                        |
|                 | La Campana    | 0.59 ± 0.26                                     | 0.67 ± 0.19                  | 0.53 ± 0.31                    | 21                        |

**Table S3**

Correlation coefficients and p-values for all dependent variables. Pearson correlation test was applied. Depicted are the correlation coefficients (cor) and the belonging p-values (p) for the differences between mound and unaffected control of all possible combinations of the physical (clay, silt, sand) and chemical (C, N, P) soil properties. Significance level:  $p < 0.05$  is printed in bold.

| Dependent variables | P          |                 | N           |                 | C     |      | Sand         |                 | Silt         |                 |
|---------------------|------------|-----------------|-------------|-----------------|-------|------|--------------|-----------------|--------------|-----------------|
|                     | cor        | p               | cor         | p               | cor   | p    | cor          | p               | cor          | p               |
| Clay                | 0.057      | 0.5             | 0.11        | 0.2             | 0.12  | 0.1  | <b>-0.49</b> | <b>&lt;0.05</b> | <b>-0.43</b> | <b>&lt;0.05</b> |
| Silt                | -0.0019    | 1               | -0.13       | 0.1             | -0.2  | 0.02 | <b>-0.57</b> | <b>&lt;0.05</b> |              |                 |
| Sand                | -0.05      | 0.5             | 0.026       | 0.8             | 0.079 | 0.3  |              |                 |              |                 |
| C                   | <b>0.2</b> | <b>&lt;0.05</b> | <b>0.74</b> | <b>&lt;0.05</b> |       |      |              |                 |              |                 |
| N                   | 0.12       | 0.1             |             |                 |       |      |              |                 |              |                 |

## II Results of GLMMs

We performed GLMMs followed by Chi-squared tests to compare the different models for physical (clay, silt, sand) and chemical (C, N, P) soil properties as the predictor variables.

**Table S4**

Results of the GLMM for clay at each site (Pan de Azúcar, Santa Gracia, La Campana). Depicted are the fixed effects for the predictors, the estimate, the standard error SE and the t- and p-value. Data from both field campaigns were used. Significant effects are labelled with asterisks: \*:  $< 0.1$ , \*\*:  $< 0.01$ , \*\*\*:  $< 0.001$ .

| Fixed effects | Estimate | SE     | t     | p     |
|---------------|----------|--------|-------|-------|
| (Intercept)   | -0.0021  | 0.0116 | -0.18 | 0.857 |

**Table S5**

Results of the GLMM for silt at each site (Pan de Azúcar, Santa Gracia, La Campana). Depicted are the fixed effects for the predictors, the estimate, the standard error SE and the t- and p-value. Data from both field campaigns were used. Significant effects are labelled with asterisks: \*: <0.1, \*\*: <0.01, \*\*\*: <0.001.

| Fixed effects                     | Estimate  | SE     | t      | p      |
|-----------------------------------|-----------|--------|--------|--------|
| (Intercept)                       | -0.0407   | 0.0684 | -0.595 | 0.553  |
| Slope                             | 0.00328   | 0.0015 | 2.19   | <0.1 * |
| Mound density                     | -0.170    | 0.105  | -1.62  | 0.109  |
| Site Pan de Azúcar                | -0.102    | 0.0732 | -1.40  | 0.164  |
| Site Santa Gracia                 | -0.000157 | 0.077  | -0.002 | 0.998  |
| Mound density: Site Pan de Azúcar | 0.256     | 0.114  | 2.24   | <0.1 * |
| Mound density: Site Santa Gracia  | 0.109     | 0.112  | 0.971  | 0.333  |

**Table S6**

Results of the GLMM for sand at each site (Pan de Azúcar, Santa Gracia, La Campana). Depicted are the fixed effects for the predictors, the estimate, the standard error SE and the t- and p-value. Data from both field campaigns were used. Significant effects are labelled with asterisks: \*: <0.1, \*\*: <0.01, \*\*\*: <0.001.

| Fixed effects | Estimate | SE     | t    | p     |
|---------------|----------|--------|------|-------|
| (Intercept)   | 0.0185   | 0.0128 | 1.45 | 0.149 |

**Table S7**

Results of the GLMM for C at each site (Pan de Azúcar, Santa Gracia, La Campana). Depicted are the fixed effects for the predictors, the estimate, the standard error SE and the t- and p-value. Data from both field campaigns were used. Significant effects are labelled with asterisks: \*: <0.1, \*\*: <0.01, \*\*\*: <0.001.

| Fixed effects                        | Estimate | SE     | t      | p          |
|--------------------------------------|----------|--------|--------|------------|
| (Intercept)                          | -1.38    | 2.39   | -0.576 | 0.566      |
| Site Pan de Azúcar                   | 1.97     | 2.57   | 0.767  | 0.444      |
| Site Santa Gracia                    | 2.08     | 2.61   | 0.767  | 0.427      |
| Mound density                        | -12.7    | 2.7    | -4.72  | <0.001 *** |
| Vegetation cover                     | -0.0571  | 0.0327 | -1.75  | <0.1 *     |
| Hillslope                            | 0.459    | 0.0982 | 4.68   | <0.001 *** |
| Site Pan de Azúcar: Mound density    | 11.8     | 2.80   | 4.21   | <0.001 *** |
| Site Santa Gracia: Mound density     | 13.2     | 2.87   | 4.59   | <0.001 *** |
| Site Pan de Azúcar: Vegetation cover | 0.145    | 0.0580 | 2.50   | <0.1 *     |
| Site Santa Gracia: Vegetation cover  | 0.0468   | 0.0457 | 1.02   | 0.308      |
| Site Pan de Azúcar: Hillslope        | -0.445   | 0.103  | -4.32  | <0.001 *** |
| Site Santa Gracia: Hillslope         | -0.477   | 0.108  | -4.39  | <0.001 *** |

**Table S8**

Results of the GLMM for N at each site (Pan de Azúcar, Santa Gracia, La Campana). Depicted are the fixed effects for the predictors, the estimate, the standard error SE and the t- and p-value. Data from both field campaigns were used. Significant effects are labelled with asterisks: \*: <0.1, \*\*: <0.01, \*\*\*: <0.001.

| Fixed effects      | Estimate | SE    | t     | p          |
|--------------------|----------|-------|-------|------------|
| (Intercept)        | 0.908    | 0.231 | 3.93  | <0.001 *** |
| Site Pan de Azúcar | -0.862   | 0.237 | -3.64 | <0.001 *** |
| Site Santa Gracia  | -0.862   | 0.254 | -3.40 | <0.001 *** |

|                                               |          |         |       |          |
|-----------------------------------------------|----------|---------|-------|----------|
| <b>Vegetation cover</b>                       | -0.00933 | 0.00315 | -2.97 | <0.01 ** |
| <b>Hillside elevation</b>                     | -0.203   | 0.0741  | -2.74 | <0.01 ** |
| <b>Site Pan de Azúcar: Vegetation cover</b>   | 0.0178   | 0.00691 | 2.58  | <0.1 *   |
| <b>Site Santa Gracia: Vegetation cover</b>    | 0.00839  | 0.00524 | 1.60  | 0.112    |
| <b>Site Pan de Azúcar: Hillside elevation</b> | 0.225    | 0.0836  | 2.69  | <0.01 ** |
| <b>Site Santa Gracia: Hillside elevation</b>  | 0.218    | 0.0854  | 2.55  | <0.1 *   |

**Table S9**

Results of the GLMM for P at each site (Pan de Azúcar, Santa Gracia, La Campana). Depicted are the fixed effects for the predictors, the estimate, the standard error SE and the t- and p-value. Data from both field campaigns were used. Significant effects are labelled with asterisks: \*: <0.1, \*\*: <0.01, \*\*\*: <0.001.

| <b>Fixed effects</b> | <b>Estimate</b> | <b>SE</b> | <b>t</b> | <b>p</b> |
|----------------------|-----------------|-----------|----------|----------|
| <b>(Intercept)</b>   | 0.104           | 0.0331    | 3.13     | <0.01 ** |

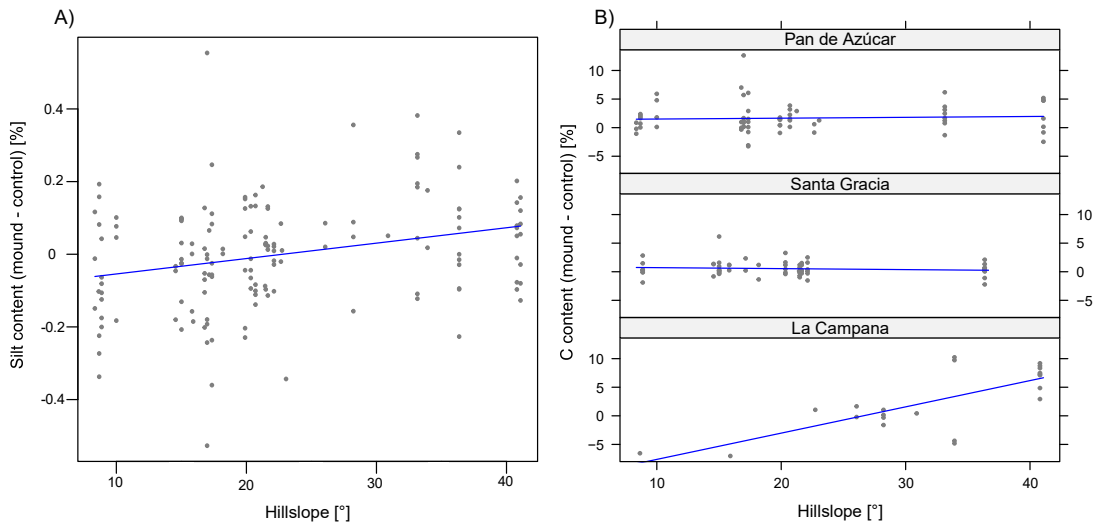

**Figure S1.** Effect plots for the fixed effect hillslope. A) Fitted relationships between hillslope [°] and silt content [%], B) fitted relationship between hillslope [°] and C content [%] at each research site (Pan de Azúcar, Santa Gracia, La Campana).

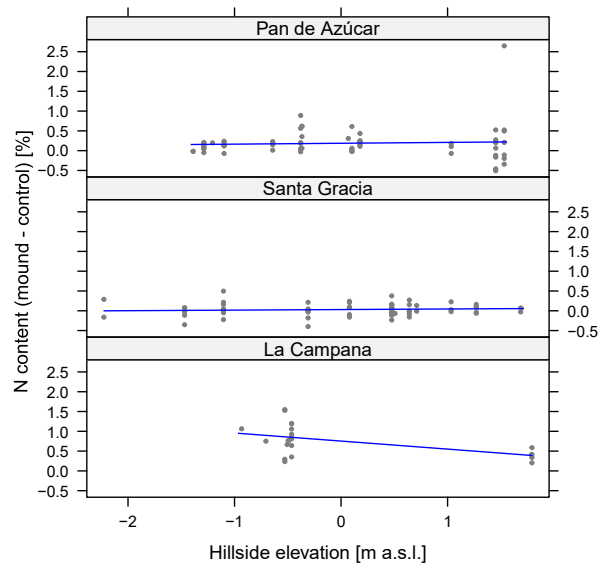

**Figure S2.** Fitted relationship between N content and the fixed effect hillside elevation [m a.s.l.] at each research site (arid Pan de Azúcar, semi-arid Santa Gracia, Mediterranean La Campana). Note that the x-axis was standardized.

### III Literature survey

We compiled a survey of literature on the effects of bioturbation on physical (clay, silt, sand) and chemical (C, N, P) soil properties analyzed in our study.

#### Table S10

Literature survey of clay, silt, sand, C, N and P contents of mound and undisturbed soils as well as the impact of bioturbation on ecological processes. We give the mean of the different soil properties (clay, silt, sand, C, N, P), the reference, the contents of the soil properties for mound and undisturbed soil samples and the impacts of bioturbation. If necessary, the units were converted to ppm for P and % for all other soil properties. Significantly different values between mound and undisturbed soil are printed bold.

| Soil property | Reference                | (Zono-) Biome | Mean of mound samples | Mean of control samples | % Input (mound - control) | Impact                                                                                                                                |
|---------------|--------------------------|---------------|-----------------------|-------------------------|---------------------------|---------------------------------------------------------------------------------------------------------------------------------------|
| Clay [%]      | Nkem et al., 2000        | III           | <b>29</b>             | <b>52</b>               | <b>-79</b>                | Increase of soil porosity                                                                                                             |
|               | Eldridge & Koen, 2008    | III           | 23                    | 22                      | 4                         | Structuring desert landscapes; providing sediment for mobilization                                                                    |
|               | Mujinya et al., 2010     | II            | 46                    | 39                      | 15                        | Mixed charge system with higher permanent and variable charges                                                                        |
|               | Clark et al., 2016       | II            | 7.5                   | 5.4                     | 28                        | Altering spatial patterning of competitive interactions, plant diversity and productivity; producing ecological ecosystem functioning |
|               | Jouquet et al., 2017     | II            | <b>36</b>             | <b>32</b>               | <b>11</b>                 | Concentration of clay particles below-ground into nests                                                                               |
|               | Carlson & Whitford, 1991 | VII           | <b>1.2</b>            | <b>2.7</b>              | <b>-25</b>                | Large gravel mounds heat up quickly due to the lower thermal capacity of coarse fragments and provide insulation                      |

|                 |                          |     |                |                |            |                                                                                                                                                                                                                                                 |
|-----------------|--------------------------|-----|----------------|----------------|------------|-------------------------------------------------------------------------------------------------------------------------------------------------------------------------------------------------------------------------------------------------|
| <b>Silt [%]</b> | Nkem et al., 2000        | III | <b>21</b>      | <b>16</b>      | <b>24</b>  | Increase of soil porosity; Differential transport of sand-sized particles for the protection of nest entrances                                                                                                                                  |
|                 | Eldridge & Koen, 2008    | III | 65             | 68             | -5         | Structuring desert landscapes; providing sediment for mobilization                                                                                                                                                                              |
|                 | Mujinya et al., 2010     | II  | 27             | 28             | -4         | Mixed charge system with higher permanent and variable charges                                                                                                                                                                                  |
|                 | Clark et al., 2016       | II  | 17             | 18             | -6         | Altering spatial patterning of competitive interactions, plant diversity and productivity; producing ecological legacies that affect ecosystem functioning                                                                                      |
|                 | Carlson & Whitford, 1991 | VII | <b>16</b>      | <b>23</b>      | <b>-44</b> | large gravel mounds heat up quickly due to the lower thermal coarse fragments and provide insulation                                                                                                                                            |
| <b>Sand [%]</b> | Nkem et al., 2000        | III | <b>50</b>      | <b>32</b>      | <b>36</b>  | Increase of soil porosity                                                                                                                                                                                                                       |
|                 | Eldridge & Koen, 2008    | III | 12             | 11             | 8          | Structuring desert landscapes; providing sediment for mobilization                                                                                                                                                                              |
|                 | Mujinya et al., 2010     | II  | 27             | 33             | -22        | Mixed charge system with higher permanent and variable charges                                                                                                                                                                                  |
|                 | Clark et al., 2016       | II  | 76             | 77             | -1         | Altering spatial patterning of competitive interactions, plant diversity and productivity; producing ecological legacies that affect ecosystem functioning; C and N dynamics function much like surface soil when soil moisture is not limiting |
|                 | Jouquet et al., 2017     | II  | 58             | 56             | 3          | Selection and concentration of clay particles below-ground into nests                                                                                                                                                                           |
|                 | Carlson & Whitford, 1991 | VII | <b>82</b>      | <b>74</b>      | <b>10</b>  | large gravel mounds heat up quickly due to the lower thermal of coarse fragments and provide insulation                                                                                                                                         |
| <b>C [%]</b>    | Nkem et al., 2000        | III | <b>0.00039</b> | <b>0.00032</b> | <b>18</b>  | Increase of plant diversity and abundance                                                                                                                                                                                                       |
|                 | Dostál et al., 2004      | VI  | <b>4.2</b>     | <b>6.4</b>     | <b>-39</b> | Support of plant growth and below-ground plant parameters; removal of organic matter from the nests                                                                                                                                             |
|                 | Eldridge & Koen, 2008    | III | 1.5            | 1.9            | -27        | Structuring desert landscapes; providing sediment for mobilization; establishment of indigenous plant species                                                                                                                                   |
|                 | Clark et al., 2016       | II  | <b>0.66</b>    | <b>1</b>       | <b>-52</b> | Altering spatial patterning of competitive interactions, plant diversity and productivity; producing ecological legacies that affect ecosystem functioning; C and N dynamics function much like surface soil when soil moisture is not limiting |
|                 | Jouquet et al., 2017     | II  | <b>2.7</b>     | <b>0.79</b>    | <b>71</b>  | C and N are incorporated into termite construction                                                                                                                                                                                              |
|                 | Yurkewycz et al., 2014   | IV  | 0.00064        | 0.00058        | 9          | Soil development is enhanced due to increased C and N, progressing soil and vegetation heterogeneity at small scales                                                                                                                            |
|                 |                          |     |                |                |            |                                                                                                                                                                                                                                                 |
| <b>N [%]</b>    | Dostál et al., 2004      | VI  | <b>0.30</b>    | <b>0.58</b>    | <b>-93</b> | Support of plant growth and below-ground plant parameters; removal of organic matter from the nests                                                                                                                                             |
|                 | Eldridge & Koen, 2008    | III | 0.11           | 0.16           | -45        | Structuring desert landscapes; providing sediment for mobilization; establishment of indigenous plant species                                                                                                                                   |
|                 | Clark et al., 2016       | II  | 0.07           | 0.11           | -57        | Altering spatial patterning of competitive interactions, plant diversity and productivity; producing ecological legacies that affect ecosystem functioning; C and N dynamics function much like surface soil when soil moisture is not limiting |
|                 | Jouquet et al., 2017     | II  | <b>0.21</b>    | <b>0.09</b>    | <b>57</b>  | C and N are incorporated into termite construction                                                                                                                                                                                              |

|                |                          |     |              |              |           |                                                                                                                      |
|----------------|--------------------------|-----|--------------|--------------|-----------|----------------------------------------------------------------------------------------------------------------------|
|                | Yurkewycz et al., 2014   | IV  | 0.051        | 0.047        | 8         | Soil development is enhanced due to increased C and N, progressing soil and vegetation heterogeneity at small scales |
| <b>P [ppm]</b> | Nkem et al., 2000        | III | <b>100.2</b> | <b>27.9</b>  | <b>72</b> | Increase of plant diversity and abundance                                                                            |
|                | Dostál et al., 2004      | VI  | 23.37        | 15.46        | 34        | Support plant growth and below-ground plant parameters; increased decomposition rate                                 |
|                | Eldridge & Koen, 2008    | III | <b>137.5</b> | <b>171.5</b> | <b>25</b> | Structuring desert landscapes; providing sediment for mobilization                                                   |
|                | Carlson & Whitford, 1991 | VII | <b>19.3</b>  | <b>1.5</b>   | <b>92</b> | relative nutrient enrichment                                                                                         |

71

72

73

74
